# Supplementary material
Source: Springer Nature journal article supplement (https://www.springermedizin.de/resource/supplementary/13722_2012_135_MOESM4_ESM.pdf/9675094)
Supplement: MOESM4 [file 9675094]

|    | <b>The doctor...</b>                                                  | <b>Woman's report (N=372)</b> | <b>Physician's report<sup>1</sup> (N=23)</b> |
|----|-----------------------------------------------------------------------|-------------------------------|----------------------------------------------|
| 1  | asked if I planned a pregnancy or used contraception                  | 0.987                         | 0.997                                        |
| 2  | asked about my alcohol consumption                                    | 0.989                         | 1                                            |
| 3  | told me about the incompatibility of pregnancy and alcohol use        | 1                             | 1                                            |
| 4  | provided information on alcohol effects on the child                  | 0.995                         | 0.995                                        |
| 5  | advised to either stop/reduce drinking or use effective contraception | 0.995                         | 0.995                                        |
| 6  | asked me what I would choose                                          | 0.949                         | 0.997                                        |
| 7  | helped me to make my choice                                           | 0.959                         | 1                                            |
| 8  | discussed with me how to achieve the goal                             | 0.941                         | 0.970                                        |
| 9  | discussed barriers with me                                            | 0.938                         | 0.965                                        |
| 10 | made a follow-up appointment                                          | 0.978                         | 0.992                                        |
| 11 | I felt doctor's support and willingness to help                       | 0.997                         | 0.992                                        |
